# Supplementary material
Source: publisher figshare collection journal article supplement (https://future-science-group.figshare.com/ndownloader/files/27339371)
Supplement: Supplementary file [file 27339371]

## Supplemental Material

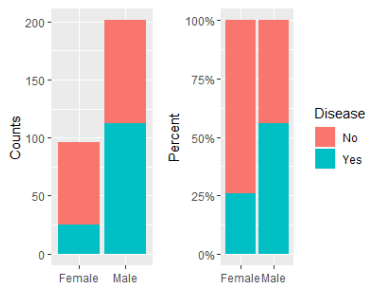

**S1:** Patients with and without heart disease.

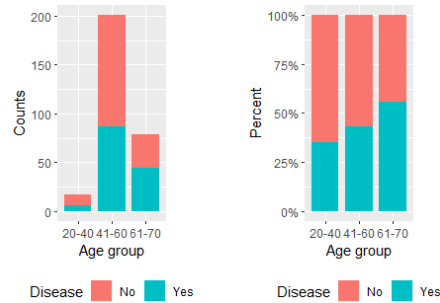

**S2:** Age of patients with and without heart disease.

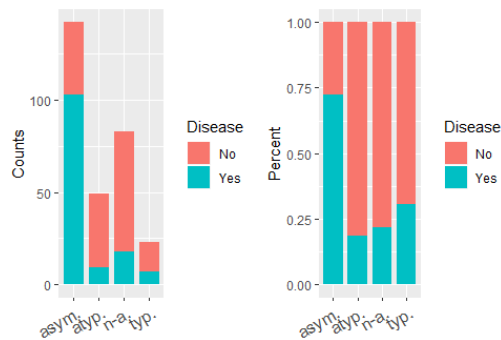

**S3:** Type of chest pain in patients with and without heart disease. Abbreviations: typ., typical angina; atyp., atypical angina; n-a., non-anginal pain; asym., asymptotic

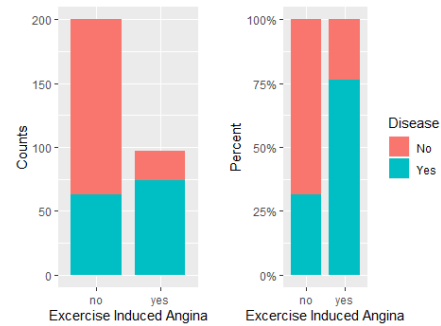

**S4:** Exercise induced angina (EIA) in patients with and without heart disease.

### Regression Tree for Heart Disease

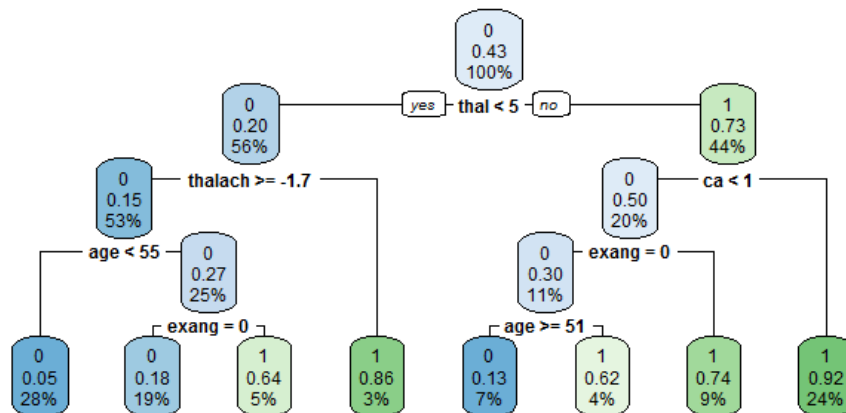

**S5:** Regression Tree Model

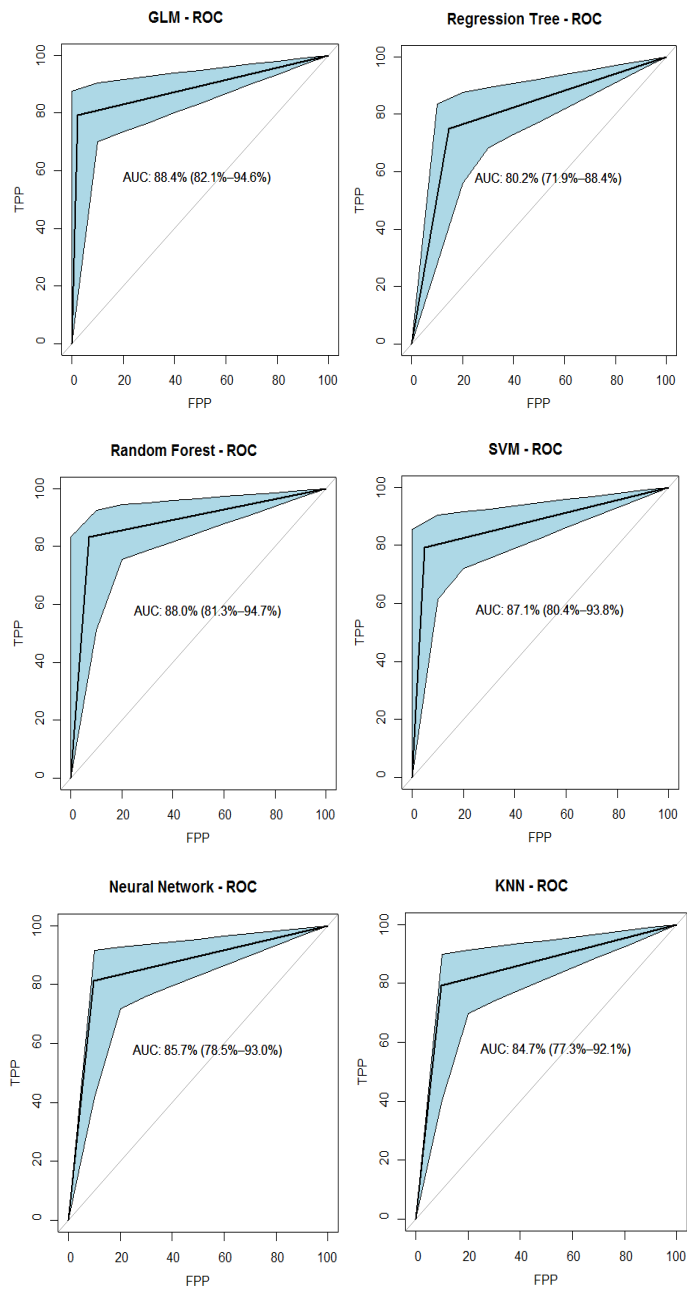

**S6:** Composite AUC-ROC curves
